# Supplementary material for: Dietary, Cultural, and Pathogens-Related Selective Pressures Shaped Differential Adaptive Evolution among Native Mexican Populations
Source: Oxford University Press journal article supplement (doi:10.1093/molbev/msab290), 2021-09-30
Supplement: msab290_supplementary_data.zip [file msab290_supplementary_data.zip]

Archive with 2 entries (2 files):
- Supplementary Material_Ojeda-Granados et al.pdf
- Supplementary tables_S7-S8_Ojeda-Granados et al.xlsx
