# Supplementary material for: Dietary, Cultural, and Pathogens-Related Selective Pressures Shaped Differential Adaptive Evolution among Native Mexican Populations
Source: Oxford University Press journal article supplement (doi:10.1093/molbev/msab290), 2021-09-30
Supplement: msab290_supplementary_data.zip [file msab290_supplementary_data.zip › Supplementary tables_S7-S8_Ojeda-Granados et al.xlsx]

## Sheet: supplementary table S7
Supplementary table S7. Genomic coordinates and absolute nSL scores for the representative variants at loci constituting the putative adaptive gene networks described in figure 3.
SER						TAR						CMC						SMC
Chr	Pos	SNP_ID	|nSL|	Gene		Chr	Pos	SNP_ID	|nSL|	Gene		Chr	Pos	SNP_ID	|nSL|	Gene		Chr	Pos	SNP_ID	|nSL|	Gene
1	64098188	rs2269251	2.9684	PGM1		1	160102060	rs6686067	1.16655	ATP1A2		1	68639385	rs17482952	2.39742	GNG12		2	25130907	rs6733224	3.35503	ADCY3
1	84555908	rs6703653	2.71298	PRKACB		1	169088679	rs2143290	2.14692	ATP1B1		1	84555908	rs6703653	1.72314	PRKACB		3	50291785	rs2282751	2.08808	GNAI2
1	181593301	rs199953	2.60633	CACNA1E		1	230341905	rs4846928	1.80926	GALNT2		1	84968749	rs17110519	1.78727	GNG5		3	138400332	rs12493155	2.8505	PIK3CB
2	33686494	rs10779917	3.0648	RASGRP3		2	31293061	rs12998538	2.13179	GALNT14		1	235758570	rs2774327	2.20935	GNG4		3	142510348	rs9815607	2.14901	TRPC1
2	75106441	rs1872837	2.51355	HK2		3	16244352	rs6800864	1.78444	GALNT15		2	155689683	rs2971899	1.57162	KCNJ3		4	102251782	rs2583394	2.93049	PPP3CA
3	53700760	rs3774523	1.98924	CACNA1D		3	24520283	rs6792725	2.297	THRB		2	166920813	rs1427651	2.10081	SCN1A		6	146746088	rs2268666	1.69348	GRM1
3	164777677	rs9290259	2.25879	SI		4	172830895	rs10026829	2.68646	GALNTL6		3	7212607	rs17288561	2.72017	GRM7		8	131865742	rs448852	3.09905	ADCY8
7	82043990	rs17156280	2.4088	CACNA2D1		4	174142874	rs12644699	1.69294	GALNT7		3	50291785	rs2282751	3.64171	GNAI2		20	8851760	rs2327120	2.83704	PLCB1
14	52297987	rs4898718	3.41039	GNG2		5	153784078	rs2112606	4.01805	GALNT10		3	51754116	rs12487957	3.49377	GRM2		20	57478807	rs7121	1.55151	GNAS
14	90869913	rs3213718	0.824268	CALM1		6	46228180	rs1345062	0.973527	RCAN2		7	126837621	rs7791345	4.04657	GRM8
						7	151657093	rs6948441	3.30375	GALNTL5		9	114423433	rs4979031	1.68226	GNG10
						8	134559333	rs3758105	1.81239	ST3GAL1		11	113313389	rs4648318	2.32667	DRD2
						9	79168025	*rs607328	0.927029	GCNT1		14	52294523	rs17124563	2.06415	GNG2
						11	11307911	rs17348760	3.10942	GALNT18		15	52436334	rs4238384	3.05383	GNB5
						12	51776725	rs11169821	2.47548	GALNT6		19	2569242	rs11671754	1.15479	GNG7
						14	69788903	rs1016692	2.4457	GALNT16		20	8944142	rs756374	2.98739	PLCB1
						15	59900683	rs11854666	2.0291	GCNT3		20	9371825	rs2179321	1.38815	PLCB4
						17	8809832	rs181533	0.920178	PIK3R5
						*intergenic SNP wihin 50 kb from the GCNT1 gene

## Sheet: supplementary table S8
Supplementary table S8. Genomic coordinates and absolute normalized H12 scores for the representative variants at loci constituting the putative adaptive gene networks reported in Supplementary Tables S3, S4, S5 and S6.
SER						TAR						CMC						SMC
Chr	Pos	SNP_ID	|nH12|	Gene		Chr	Pos	SNP_ID	|nH12|	Gene		Chr	Pos	SNP_ID	|nH12|	Gene		Chr	Pos	SNP_ID	|nH12|	Gene
1	160112741	rs1046995	3.82077	ATP1A2		1	11299511	rs7544489	0.777799	MTOR		2	191861377	rs16833155	0.282801	STAT1		1	84526918	rs3915908	0.583429	PRKACB
1	160145707	rs11805919	2.3789	ATP1A4		1	165349087	rs965743	1.1407	RXRG		3	49410264	rs13317185	7.47956	RHOA		3	49410264	rs13317185	15.0407	RHOA
2	152775308	rs12471646	7.51848	CACNB4		2	191855521	rs7562024	0.743736	STAT1		3	50291617	rs9852677	1.45943	GNAI2		3	50291785	rs2282751	3.03616	GNAI2
2	40513714	rs11891800	4.58515	SLC8A1		5	153774496	rs17637310	1.98207	GALNT10		17	4615098	rs3786047	0.268795	ARRB2		5	153027222	rs729329	6.65596	GRIA1
10	52755037	rs16912389	5.44287	PRKG1		7	71057204	rs868672	4.99305	GALNT17								7	6434087	rs836474	1.07551	RAC1
12	26986748	rs10842800	2.34159	ITPR2														9	136797713	rs2789843	1.53863	VAV2
12	90037342	rs4842670	2.9196	ATP2B1														11	77091574	rs2729761	0.687817	PAK1
15	40606484	rs10163076	2.9196	PLCB2														18	18560354	rs7227454	0.57787	ROCK1
																		22	37610419	rs28614056	0.948752	RAC2
